# Supplementary material
Source: HighWire-hosted journal article supplement (https://jnm.snmjournals.org/highwire/filestream/94452/field_highwire_adjunct_files/0/119867_Supplemental_Data.pdf)
Supplement: 119867_Supplemental_Data.pdf [file 119867_Supplemental_Data.pdf]

## Supporting Information

### Methods and Materials

#### General

Chemicals were purchased from Sigma Aldrich (St. Louis, MO) except when indicated. *p*-Benzyl-isothiocyanato-desferroxamine was obtained from Macrocyclics, Inc. (Dallas, Texas). Chemicals were used without further manipulations unless stated. Metal-free ultrapure water (>18.2 MΩ·cm, Milli-Q, Millipore, Billerica, MA) was obtained by allowing Chelex 100 resin (Bio-Rad Laboratories, Hercules, CA) to soak overnight at a ratio of 5g resin per 100 ml water as stated by the manufacturer. For dose calibration measurements, a Capintec CRC-55tR (Capintec, Ramsey NJ) calibrated for Zr-89 was utilized. Activity quantification as counts-per-minute (cpm) was obtained through a Perkin Elmer Wizard<sup>2</sup> 2480 automatic gamma counter with an energy window of 800-1000 keV normalized for Zr-89 (909 keV). Radiochemical purity and yields were determined via a Bioscan AR-2000 radioTLC plate reader equipped with Winscan version 3.13 software. Silica-gel impregnated glass-fiber instant thin-layer chromatography paper (ITLC-SG, Varian Inc.) was used for ITLC analysis with 50 mM DTPA, pH 7 as the mobile phase. PD10 desalting columns containing Sephadex G-25 M pre-packed resins were purchased from GE Healthcare, UK. Centrifugal columns having a 10 kDa molecular weight cut-off were purchased from Millipore Corp. (Billerica, MA).

#### Cell lines

All tissue culture manipulations were conducted under a laminar flow hood using aseptic technique. Colo205-luc2 colorectal cancer cells (Bioware Ultra Caliper Life Sciences, Hopkinton, MA) were grown as adherent monolayers with RPMI 1640 (ATCC, Manassas, VA) supplemented with 10% fetal bovine serum (FBS, heat inactivated). DMS79 small cell lung (CRL-2049), and BxPC3 (CRL-1687) pancreas carcinoma were all purchased from ATCC. DMS79 cells were grown as suspended aggregates in RPMI 1640 media supplemented with 10% FBS and L-glutamine. The melanoma cell line SK-MEL-28 was propagated with Eagle's Minimum Essential Medium and 10% FBS while BxPC3 cells were cultured in RPMI1640 with 10% FBS. All cells were grown in a 5% CO<sub>2</sub> atmosphere at 37 °C with bi-weekly serial passages upon reaching confluence. Adherent cells were harvested with 0.25% Trypsin and 0.53 mM EDTA in Hank's Buffered Salt Solution (HBSS) with no calcium or magnesium present. The cells were counted using Vi-cell cell viability counter (Beckman Coulter, Fullerton, CA).

#### Animal models

All animals were treated according to guidelines set by the Institutional Animal Care and Use Committee. Female CB17SC-F severe combined immunodeficient (SCID) mice with restricted flora (Taconic Farms, Inc., Hudson, NY) and female athymic (nu/nu) mice (Harlan Laboratories) were quarantined for acclimatization in MSKCC animal facility for 1 week prior to xenografting. These mice were freely given access to food and water at all times. Tumors were induced on the hind legs by subcutaneous (s.c.) injection of 2-3×10<sup>6</sup> million cells of the cell lines mentioned above in a 200 μL suspension of 1:1 media: BD Matrigel Basement Membrane Matrix (BD

Sciences, Bedford, MA). Palpable tumors developed approximately five weeks for the DMS79 cancer line and 2-3 weeks for the rest of the other malignancies after implantation.

### **Preparation of 5B1-DFO conjugate**

A volume of 200  $\mu\text{L}$  containing 1.24 mg (7.8 nmol) of 5B1 (6.2 mg/ml in saline) was added onto a 1.5 ml tube. The pH of the protein solution was adjusted to  $\sim 8.9$ -9.1 using 0.1 M sodium carbonate. A four-fold equivalence of DFO-Bz-SCN (23.5  $\mu\text{g}$  or 31.2 nmol in 20  $\mu\text{L}$  DMSO) was added to the vial. The reaction was incubated at 37  $^{\circ}\text{C}$  for 45 minutes with occasional mild stirring. Subsequent purification using a PD10 size exclusion column removed any unreacted DFO-Bz-SCN and DMSO with 0.9% saline as the mobile phase. Through Lindmo assays, the immunoreactivity was determined to be moderately retained at  $\sim 72.4 \pm 1.1\%$ .

### **Zr-89 Radiolabeling**

The production of Zr-89 was made by a proton irradiation of a solid yttrium foil target on an EBCO TR19/9 variable beam energy cyclotron (EbcO Industries Inc., British Columbia, Canada) using methods published previously (1). After end-of-bombardment, Zr-89 was isolated from the target by passing through a column of hydroxamate modified resin essentially capturing the isotope of interest. Elution was done by washing the column with 1 M oxalic acid resulting in a  $>99.99\%$  radionuclidic and radiochemical purity and an effective specific activity of 195-497 MBq/ $\mu\text{g}$  (5.28-13.4 mCi/ $\mu\text{g}$ ) (1, 2). Typical radiolabeling conditions involve the following protocols. A solution of  $^{89}\text{Zr}$ -oxalate ( $\sim 4$  mCi) was added into a 1.5 ml vial and the pH was adjusted to  $\sim 7.0$ -7.2 with 1 M  $\text{Na}_2\text{CO}_3$ . Effervescence was observed as the neutralization process resulted in  $\text{CO}_2$  evolution. After the pH was adjusted and equilibrium was reached, 84  $\mu\text{L}$  (323  $\mu\text{g}$ ) of 5B1-DFO (3.86 mg/ml) in saline was added. The reaction was incubated at room temperature with intermittent mild shaking. After 1-2 h, the reaction was quenched with approximately 50  $\mu\text{L}$  of 50 mM DTPA (pH $\sim 7$ ). Crude radiolabeling yields were determined to be  $>95\%$  using iTLC with the Zr-89 5B1 complex remaining at the origin ( $R_f=0.30$ ) while the free Zr-89 is found at the solvent front ( $R_f=0.65$ ). Purification of  $^{89}\text{Zr}$ -5B1 was performed using PD10 size exclusion column with saline as the eluent. The final radiochemical purity was  $>99\%$  based on iTLC analysis.

1. Holland JP, Sheh Y, Lewis JS. Standardized methods for the production of high specific-activity zirconium-89. *Nucl Med Biol.* 2009;36:729-739.
2. Verel I, Visser GW, Boellaard R, Stigter-van Walsum M, Snow GB, van Dongen GA.  $^{89}\text{Zr}$  immuno-PET: comprehensive procedures for the production of  $^{89}\text{Zr}$ -labeled monoclonal antibodies. *J Nucl Med.* 2003;44:1271-1281.

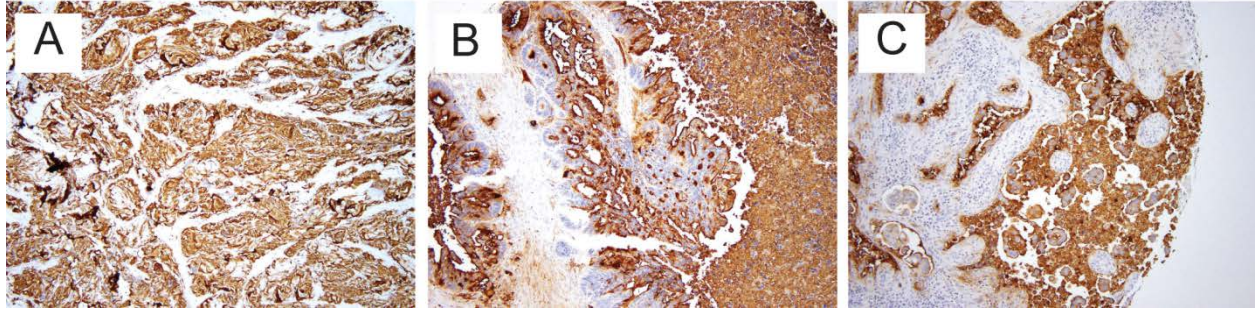

**Supplemental Figure 1.** 5B1 immunohistochemistry staining on Urinary bladder, mucinous adenocarcinoma, stage IV (A); Ovary, metastatic carcinoma from colon (B); and Lymph node, metastatic carcinoma , IIIA (C).

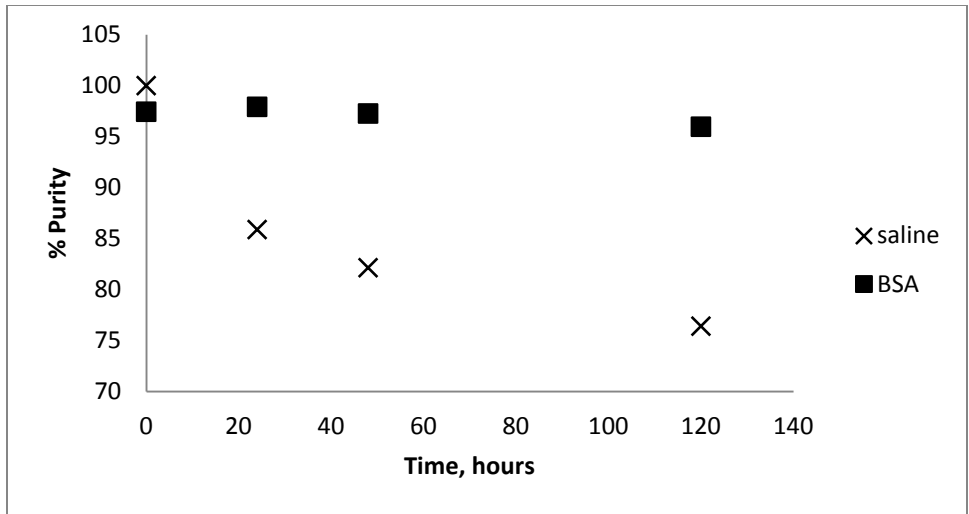

**Supplemental Figure 2.** Stability curve showing remaining % bound Zr-89 in saline and 1% BSA solutions at 37 °C over five days.

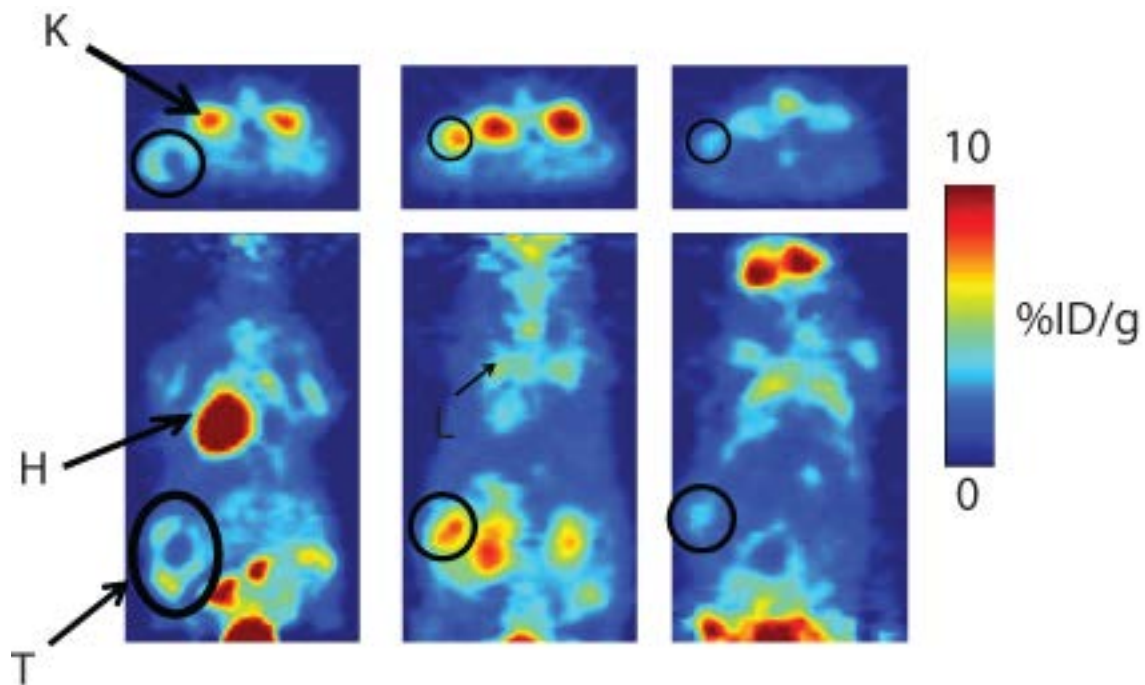

**Supplemental Figure 3.** Representative planar images of mice bearing orthotopic BxPC3 pancreas xenografts with FDG as the radiotracer show moderate tumor (T) detection with non-specific binding in normal tissues particularly in the kidneys (K), heart (H) and lungs (L).

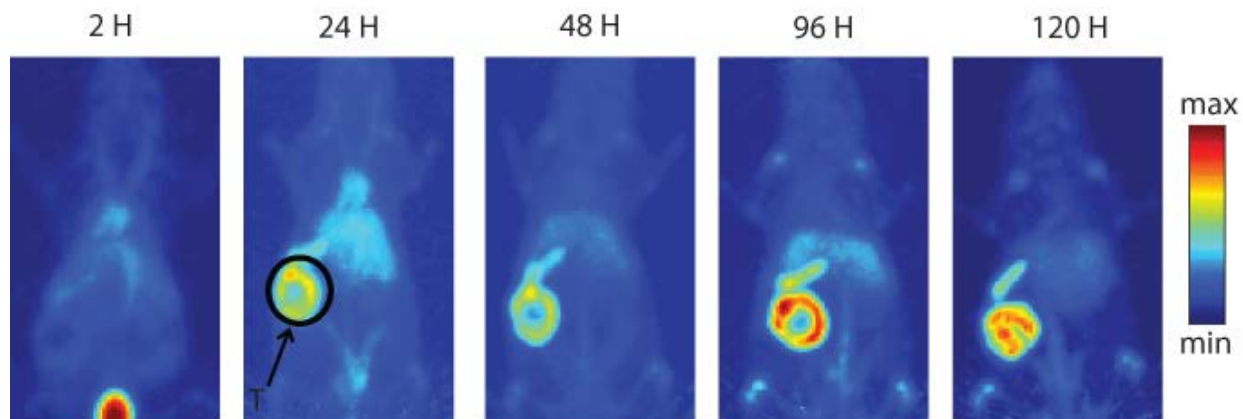

**Supplemental Figure 4.** Serial PET maximum intensity projection images of mice bearing BxPC3 pancreas tumor xenografts transplanted in the pancreas with  $^{89}\text{Zr}$ -5B1 as the PET tracer acquired from 2-120 h post-intravenous injection. The tumor (T) is remarkably delineated by  $^{89}\text{Zr}$ -5B1.

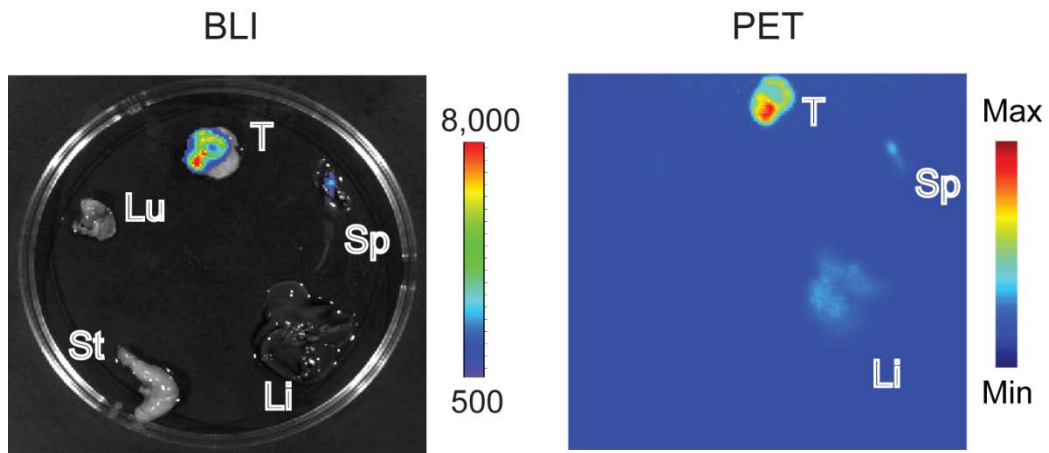

**Supplemental Figure 5.** BLI (left) and PET (right) imaging of BxPC3 pancreatic tumor (T) and normal tissues (i.e. spleen=Sp, liver=Li, stomach=St, lungs=Lu).

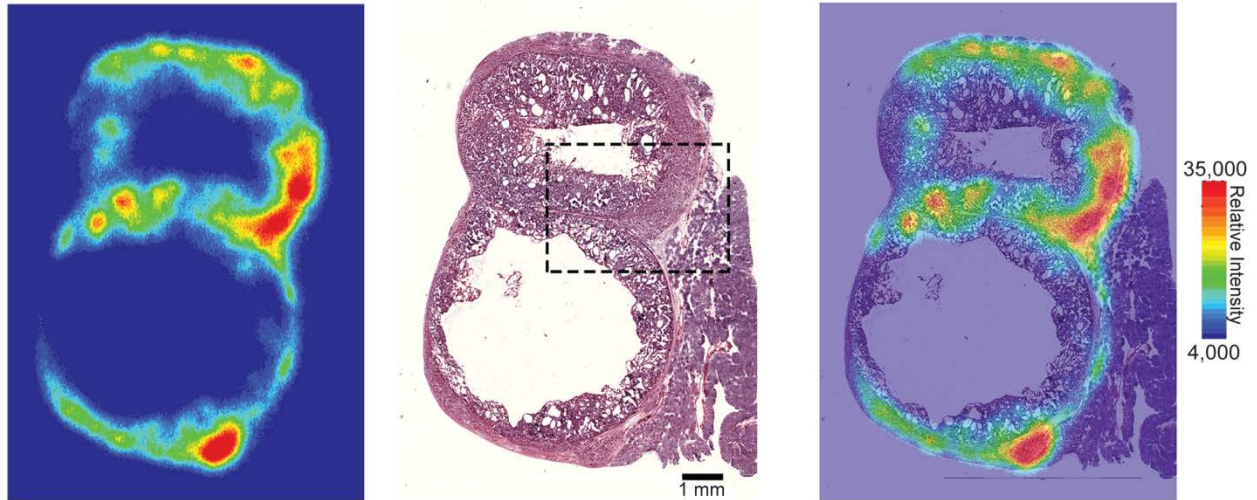

**Supplemental Figure 6.** Digital Autoradiography (left), histologic staining (center) and co-registration (right) of a tumor section obtained from an orthotopic BxPC3 tumor.



Supplemental Table 1: Survey of 5B1 binding to normal tissues. Most tissues were negative, except selected <sup>1</sup> breast ductal cells (top), <sup>2</sup> sigmoid colon goblet cells (middle), and <sup>3</sup> pancreas exocrine cells (bottom).

| Normal Tissue | Stain          |
|---------------|----------------|
| Brain         | neg            |
| Breast        | + <sup>1</sup> |
| Colon         | + <sup>2</sup> |
| Kidney        | neg            |
| Liver         | neg            |
| Lung          | neg            |
| Lymph node    | neg            |
| Muscle        | neg            |
| Pancreas      | + <sup>3</sup> |
| Placenta      | neg            |
| Skin          | neg            |
| Spleen        | neg            |
| Stomach       | neg            |

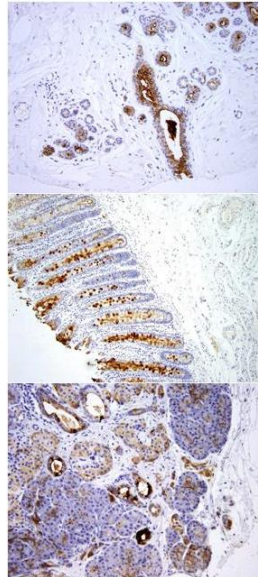

Supplemental Table 2: Staining of Pancreatic ductal adenocarcinomas with 5B1.

| IHC 5B1     | Stage | Age | Sex | Histology                 |
|-------------|-------|-----|-----|---------------------------|
| neg         | II    | 71  | M   | moderately differentiated |
| pos++       | III   | 68  | M   | moderately differentiated |
| neg         | III   | 64  | F   | moderately differentiated |
| pos++       | III   | 46  | M   | moderately differentiated |
| pos++       | III   | 54  | M   | moderately differentiated |
| pos++       | III   | 40  | M   | moderately differentiated |
| pos+/-      | IVA   | 66  | M   | moderately differentiated |
| pos++       | IVA   | 45  | M   | moderately differentiated |
| poor tissue | IVA   | 64  | F   | moderately differentiated |
| pos++       | IVA   | 69  | M   | poorly differentiated     |

Supplemental Table 3: Biodistribution of <sup>89</sup>Zr-5B1 administered via lateral tail vein in female SCID mice bearing DMS79 small cell lung cancer xenografts.

| Tissue       | 24 h<br>n=5  | 48 h<br>n=5   | 120 h<br>n=5 | 24 h block<br>n=5 | 24 h IgG<br>n=5 |
|--------------|--------------|---------------|--------------|-------------------|-----------------|
| Blood        | 11.04 ± 2.14 | 6.29 ± 0.32   | 2.63 ± 0.53  | 14.38 ± 4.24      | 11.47 ± 1.35    |
| Tumor        | 28.16 ± 0.45 | 16.18 ± 8.75  | 9.36 ± 2.09  | 14.53 ± 8.60      | 6.08 ± 2.91     |
| Heart        | 3.76 ± 0.20  | 3.33 ± 0.63   | 1.55 ± 0.27  | 4.84 ± 0.88       | 4.50 ± 1.84     |
| Lungs        | 9.13 ± 1.64  | 5.94 ± 0.76   | 3.01 ± 0.69  | 11.28 ± 1.72      | 9.93 ± 0.94     |
| Liver        | 2.59 ± 1.33  | 2.09 ± 1.19   | 1.30 ± 0.74  | 4.58 ± 2.23       | 2.69 ± 0.88     |
| Spleen       | 4.29 ± 0.77  | 4.16 ± 0.66   | 2.81 ± 0.57  | 4.51 ± 1.36       | 3.10 ± 0.73     |
| Stomach      | 1.14 ± 0.38  | 1.12 ± 0.62   | 0.17 ± 0.09  | 1.50 ± 0.44       | 0.97 ± 0.31     |
| Sm.intestine | 1.23 ± 0.40  | 0.96 ± 0.21   | 0.21 ± 0.04  | 1.76 ± 0.39       | 1.19 ± 0.10     |
| Lg.intestine | 0.50 ± 0.03  | 0.81 ± 0.34   | 0.17 ± 0.04  | 0.57 ± 0.07       | 0.52 ± 0.27     |
| Kidneys      | 3.17 ± 1.33  | 2.57 ± 0.96   | 1.78 ± 0.99  | 1.51 ± 0.73       | 5.78 ± 0.98     |
| Bone         | 5.86 ± 1.19  | 5.47 ± 1.80   | 6.16 ± 1.34  | 6.59 ± 1.81       | 3.55 ± 0.93     |
| Muscle       | 0.63 ± 0.12  | 0.55 ± 0.17   | 0.31 ± 0.22  | 0.86 ± 0.09       | 0.50 ± 0.28     |
| Tumor/Blood  | 3.15 ± 0.64  | 5.19 ± 1.86   | 6.22 ± 2.62  |                   |                 |
| Tumor/Muscle | 30.50 ± 7.80 | 58.60 ± 17.88 | 32.08 ± 7.47 |                   |                 |
| Tumor/Liver  | 17.39 ± 8.77 | 13.44 ± 5.57  | 12.99 ± 3.56 |                   |                 |
| Tumor/Kidney | 15.29 ± 2.52 | 6.37 ± 0.27   | 9.10 ± 1.00  |                   |                 |

Supplemental Table 4: Biodistribution of <sup>89</sup>Zr-5B1 in selected organs of female SCID Mice bearing Colo205-luc tumors

| Tissue        | 24 h         |              |              |                  |                  | 48 h          |
|---------------|--------------|--------------|--------------|------------------|------------------|---------------|
|               | 10 ug<br>n=4 | 25 ug<br>n=3 | 50 ug<br>n=4 | block<br>n=3     | IgG<br>n=3       | 25 ug<br>n=3  |
| Blood         | 2.75 ± 0.33  | 6.74 ± 3.26  | 5.54 ± 0.89  | 1.62 ± 0.26      | 12.2<br>9 ± 3.97 | 0.98 ± 0.63   |
| Tumor         | 5.50 ± 0.40  | 9.60 ± 2.11  | 8.96 ± 4.66  | 1.07 ± 0.65      | 3.94 ± 1.93      | 4.02 ± 2.00   |
| Heart         | 1.84 ± 0.82  | 3.36 ± 1.92  | 2.74 ± 1.52  | 0.67 ± 0.14      | 3.87 ± 1.02      | 0.90 ± 0.24   |
| Liver         | 14.30 ± 0.59 | 8.55 ± 6.40  | 10.90 ± 5.40 | 18.9<br>8 ± 3.25 | 7.61 ± 0.04      | 11.89 ± 2.01  |
| Spleen        | 11.59 ± 4.17 | 6.24 ± 1.80  | 7.41 ± 2.90  | 3.12 ± 0.77      | 7.68 ± 5.70      | 13.30 ± 0.72  |
| Stomach       | 0.40 ± 0.26  | 0.43 ± 0.11  | 0.81 ± 0.21  | 0.35 ± 0.14      | 0.54 ± 0.08      | 0.39 ± 0.29   |
| Sm. intestine | 0.90 ± 0.90  | 0.43 ± 0.15  | 0.91 ± 0.29  | 0.25 ± 0.02      | 0.71 ± 0.15      | 0.62 ± 0.12   |
| L. intestine  | 0.95 ± 0.73  | 0.87 ± 0.28  | 0.82 ± 0.27  | 0.71 ± 0.44      | 0.89 ± 0.38      | 0.89 ± 0.93   |
| Kidney        | 2.08 ± 0.48  | 2.57 ± 0.54  | 2.06 ± 0.82  | 1.09 ± 0.55      | 12.8<br>4 ± 0.87 | 2.05 ± 1.45   |
| Muscle        | 0.73 ± 0.17  | 0.81 ± 0.48  | 0.44 ± 0.21  | 2.43 ± 0.08      | 0.64 ± 0.20      | 3.66 ± 1.01   |
| Bone          | 5.68 ± 0.83  | 1.92 ± 1.30  | 3.25 ± 1.12  | 0.29 ± 0.19      | 3.34 ± 0.95      | 0.32 ± 0.15   |
| Tumor/Blood   | 2.03 ± 0.36  | 1.42 ± 0.86  | 1.73 ± 1.08  |                  | 0.31 ± 0.07      | 1.40 ± 0.46   |
| Tumor/Muscle  | 7.90 ± 2.38  | 13.80 ± 5.22 | 24.99 ± 9.95 |                  | 6.15 ± 2.02      | 17.47 ± 10.63 |
| Tumor/Liver   | 0.39 ± 0.04  | 1.82 ± 1.51  | 0.69 ± 0.50  |                  | 0.77 ± 0.43      | 1.00 ± 0.72   |
| Tumor/Kidney  | 2.77 ± 0.87  | 3.93 ± 1.57  | 4.38 ± 1.76  |                  | 0.42 ± 0.20      | 3.07 ± 1.85   |

Supplemental Table 5: Biodistribution of  $^{89}\text{Zr}$ -5B1 administered via lateral tail vein in female SCID mice bearing BxPC3 pancreas cancer xenografts.

| Tissue         | 24 h<br>n=4   | 48 h<br>n=4   | 120 h<br>n=4   | 24 h block<br>n=5 | 24 h IgG<br>n=5 |
|----------------|---------------|---------------|----------------|-------------------|-----------------|
| Blood          | 18.04 ± 1.87  | 13.76 ± 1.31  | 9.33 ± 1.19    | 19.76 ± 5.55      | 23.65 ± 1.09    |
| Tumor          | 84.73 ± 12.28 | 75.38 ± 20.71 | 114.07 ± 23.09 | 51.97 ± 25.64     | 11.22 ± 1.63    |
| Heart          | 7.32 ± 1.61   | 5.51 ± 0.38   | 4.00 ± 0.85    | 8.37 ± 2.58       | 9.28 ± 1.24     |
| Lungs          | 13.04 ± 3.87  | 12.77 ± 0.77  | 8.59 ± 3.60    | 16.87 ± 3.11      | 16.34 ± 3.83    |
| Liver          | 5.13 ± 1.99   | 6.94 ± 2.09   | 6.70 ± 3.73    | 5.56 ± 2.10       | 4.48 ± 1.75     |
| Spleen         | 11.50 ± 2.80  | 19.09 ± 7.13  | 19.84 ± 7.90   | 7.11 ± 1.67       | 7.25 ± 1.52     |
| Stomach        | 1.59 ± 0.65   | 1.14 ± 0.73   | 1.52 ± 0.36    | 1.67 ± 0.79       | 1.04 ± 0.36     |
| Sm. Intestines | 1.81 ± 1.03   | 1.60 ± 0.31   | 1.83 ± 0.33    | 1.73 ± 0.64       | 1.49 ± 0.26     |
| L. Intestines  | 1.29 ± 0.57   | 0.86 ± 0.24   | 1.21 ± 0.55    | 1.53 ± 0.59       | 1.15 ± 0.41     |
| Kidney         | 5.74 ± 1.52   | 6.73 ± 2.20   | 6.95 ± 2.82    | 8.67 ± 2.42       | 22.53 ± 7.40    |
| Bone           | 7.27 ± 2.66   | 6.13 ± 3.31   | 9.52 ± 1.44    | 8.01 ± 2.00       | 6.37 ± 1.60     |
| Muscle         | 1.66 ± 0.48   | 1.39 ± 0.44   | 0.82 ± 0.36    | 1.71 ± 0.23       | 1.38 ± 0.41     |
| Pancreas       | 2.78 ± 0.66   | 1.73 ± 0.80   | 0.96 ± 0.39    | 2.66 ± 0.98       | 2.96 ± 1.17     |
| Tumor/Blood    | 4.71 ± 0.56   | 7.59 ± 2.41   | 11.15 ± 0.94   |                   |                 |
| Tumor/Muscle   | 51.82 ± 18.98 | 58.95 ± 28.66 | 178.27 ± 29.28 |                   |                 |
| Tumor/Liver    | 10.11 ± 3.84  | 11.62 ± 2.20  | 26.41 ± 11.67  |                   |                 |
| Tumor/Kidney   | 15.11 ± 5.50  | 9.60 ± 1.49   | 15.43 ± 4.97   |                   |                 |
| Tumor/Pancreas | 27.30 ± 4.11  | 41.08 ± 10.39 | 148.39 ± 19.13 |                   |                 |
